# Supplementary material for: Iron related biomarkers predict disease severity in a cohort of Portuguese adult patients during COVID-19 acute infection
Source: bioRxiv or medRxiv preprint supplement (doi:10.1101/2021.09.09.21263251), 2021-09-14

Table S1– Distribution of COVID-19 patients among the severity groups, according to the presence of different comorbidities.

| Severity groups                                   | 2    | 3    | 4    | 5    | Total |
|---------------------------------------------------|------|------|------|------|-------|
| Count                                             | 28   | 48   | 32   | 19   | 127   |
| Percentage in each group                          | 22.0 | 37.8 | 25.2 | 15.0 | 100   |
| <b>Diabetes</b>                                   |      |      |      |      |       |
| Count                                             | 7    | 20   | 13   | 12   | 52    |
| Percentage in each group                          | 13.5 | 38.5 | 25   | 23.1 | 100   |
| Percentage within each severity group             | 25.0 | 41.2 | 40.1 | 63.2 |       |
| <b>Severity groups</b><br>$\chi^2=6.883, p=0.077$ |      |      |      |      |       |
| <b>Hypertension</b>                               |      |      |      |      |       |
| Count                                             | 12   | 34   | 21   | 16   | 83    |
| Percentage in each group                          | 14.5 | 41.0 | 25.3 | 19.3 | 100   |
| Percentage within each severity group             | 42.9 | 70.8 | 65.6 | 84.2 |       |
| $\chi^2=9.880, p=0.020$                           |      |      |      |      |       |
| <b>Obesity</b>                                    |      |      |      |      |       |
| Count                                             | 4    | 17   | 8    | 2    | 31    |
| Percentage in each group                          | 12.9 | 54.8 | 25.8 | 6.5  | 100   |
| Percentage within each severity group             | 14.3 | 35.4 | 25.0 | 10.5 |       |
| $\chi^2=6.698, p=0.082$                           |      |      |      |      |       |
| <b>Dyslipidaemia</b>                              |      |      |      |      |       |
| Count                                             | 7    | 21   | 15   | 13   | 56    |
| Percentage in each group                          | 12.5 | 37.5 | 26.8 | 23.2 | 100   |
| Percentage within each severity group             | 25.0 | 43.4 | 46.9 | 13.0 |       |
| $\chi^2=8.805, p=0.032$                           |      |      |      |      |       |
| <b>CKD</b>                                        |      |      |      |      |       |
| Count                                             | 0    | 10   | 4    | 4    | 18    |
| Percentage in each group                          | 0    | 55.6 | 22.2 | 22.2 | 100   |
| Percentage within each severity group             | 0    | 20.8 | 12.5 | 21.1 |       |
| $\chi^2=7.187, p=0.066$                           |      |      |      |      |       |
| <b>CRD</b>                                        |      |      |      |      |       |
| Count                                             | 5    | 8    | 2    | 4    | 18    |
| Percentage in each group                          | 27.8 | 44.4 | 11.1 | 16.7 | 100   |
| Percentage within each severity group             | 17.9 | 16.7 | 6.3  | 21.1 |       |
| $\chi^2=2.225, p=0.522$                           |      |      |      |      |       |
| <b>Anemia</b>                                     |      |      |      |      |       |
| Count                                             | 0    | 4    | 0    | 0    | 4     |
| Percentage in each group                          | 0    | 100  | 0    | 0    | 100   |
| Percentage within each severity group             | 0    | 8.3  | 0    | 0    |       |
| $\chi^2=6.797, p=0.079$                           |      |      |      |      |       |
| <b>Hypocoagulation</b>                            |      |      |      |      |       |
| Count                                             | 1    | 8    | 2    | 0    | 11    |
| Percentage in each group                          | 9.1  | 72.7 | 18.2 | 0    | 100   |
| Percentage within each severity group             | 3.6  | 16.7 | 6.3  | 0    |       |
| $\chi^2=6.842, p=0.077$                           |      |      |      |      |       |

$\chi^2$ : Pearson Chi-Square, p: Asymptotic significance (two-sided)

Table S2 – Counts and Percentage of first samples with detectable cytokines.\*

| Cytokines (pg/ml)             | COVID-19 Negative | COVID-19 Positive |
|-------------------------------|-------------------|-------------------|
| IL-1beta                      | 14.5% (8/55)      | 22.4% (12/49)     |
| IL-6                          | 74.5% (41/55)     | 87.8% (43/49)     |
| IL-8                          | 96.4% (53/55)     | 98.0% (48/49)     |
| IL-10                         | 78.1% (43/55)     | 96.0% (47/49)     |
| IL-12p70                      | 60.0% (33/55)     | 75.5% (31/49)     |
| IL-18 <sup>a</sup>            | 31.3% (15/48)     | 59.5% (25/42)     |
| IL-23 <sup>b</sup>            | 12.5% (6/48)      | 33.3% (14/42)     |
| IL-33                         | 22.9% (11/48)     | 23.8% (10/42)     |
| MCP-1                         | 100% (48/48)      | 95.2% (40/42)     |
| TNF alpha <sup>c</sup>        | 12.7% (7/55)      | 26.5% (13/49)     |
| Interferon gamma <sup>d</sup> | 29.2% (19/48)     | 76.1% (32/42)     |
| Interferon alpha 2            | 54.1% (26/48)     | 76.0% (32/42)     |

\*Inside brackets: number of positive samples/number of samples analysed.

COVID-19-positive vs COVID-19-negative <sup>a</sup>IL-18: 437.7±486.2 vs 912.2±806.7 pg/ml – p=0.0697;

<sup>b</sup>IL-23 10.89±13.07 vs 50.46±139.4 pg/ml – p=0.5466;

<sup>c</sup>TNF alpha 22.38±23.11 vs 30.92 ± 27.46 pg/ml – p=0.5880;

<sup>d</sup>Interferon gamma 17.28±43.28 vs 25.19±36.49 pg/ml – p=0.0062

Table S3 – Number of individual determinations per figure or table.

|                      | COVID19 negative | COVID-19 positive | BD |
|----------------------|------------------|-------------------|----|
| Iron                 | 84               | 114               | 35 |
| Transferrin          | 84               | 114               | 35 |
| Tf sat               | 84               | 114               | 35 |
| Ferritin             | 84               | 114               | 35 |
| Hepcidin             | 89               | 96                | 35 |
| Heme                 | 142              | 85                | 35 |
| Haptoglobin          | 23               | 33                | 10 |
| Erythropoetin        | 65               | 99                | 35 |
| RBC                  | 169              | 124               |    |
| Hb                   | 169              | 124               |    |
| HCT                  | 169              | 124               |    |
| MCV                  | 169              | 124               |    |
| MCH                  | 169              | 124               |    |
| MCHC                 | 169              | 124               |    |
| RDWCV                | 169              | 124               |    |
| RDWSD                | 169              | 124               |    |
| WBC                  | 169              | 124               |    |
| Neutrophils          | 155              | 122               |    |
| Lymphocytes          | 155              | 122               |    |
| Monocytes            | 155              | 122               |    |
| platelets            | 169              | 124               |    |
| platelets MPV        | 166              | 121               |    |
| platelets PDW        | 166              | 121               |    |
|                      |                  | Iron              |    |
| severity 2           | 20               | 23                |    |
| severity 3           | 40               | 44                |    |
| severity 4           | 17               | 30                |    |
| severity 5           | 5                | 17                |    |
|                      |                  | Transferrin       |    |
| severity 2           | 20               | 23                |    |
| severity 3           | 40               | 44                |    |
| severity 4           | 17               | 30                |    |
| severity 5           | 5                | 17                |    |
| Figure 1 and table 1 |                  | Ferritin          |    |
| severity 2           | 20               | 23                |    |
| severity 3           | 40               | 44                |    |
| severity 4           | 17               | 30                |    |
| severity 5           | 5                | 17                |    |
|                      |                  | WBC               |    |
| severity 2           | 39               | 27                |    |
| severity 3           | 67               | 47                |    |
| severity 4           | 43               | 32                |    |
| severity 5           | 6                | 18                |    |
|                      |                  | Lymphocytes       |    |
| severity 2           | 39               | 26                |    |
| severity 3           | 62               | 47                |    |
| severity 4           | 38               | 32                |    |

Figures 2 and 3

**S1****a**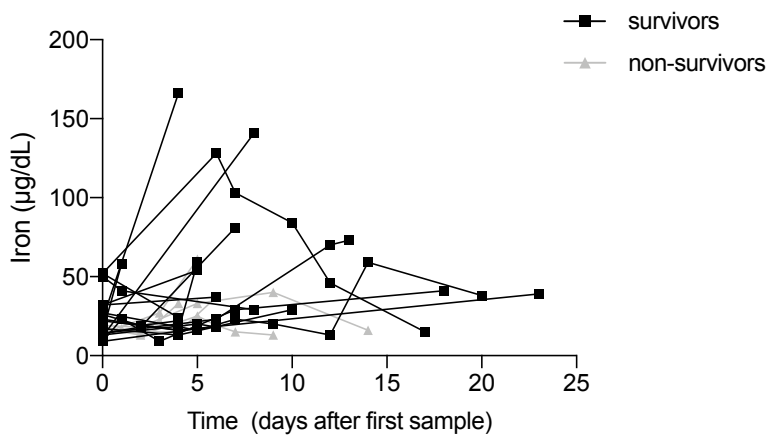**b**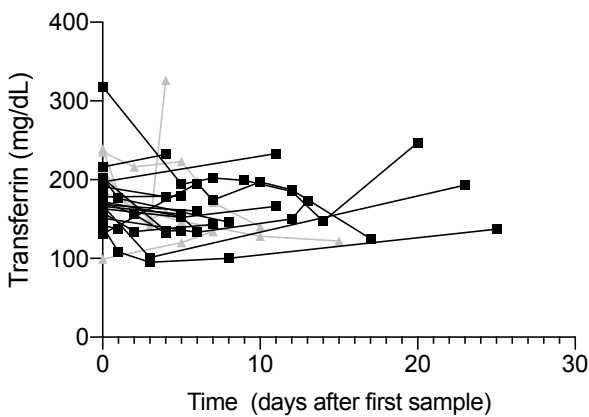**c**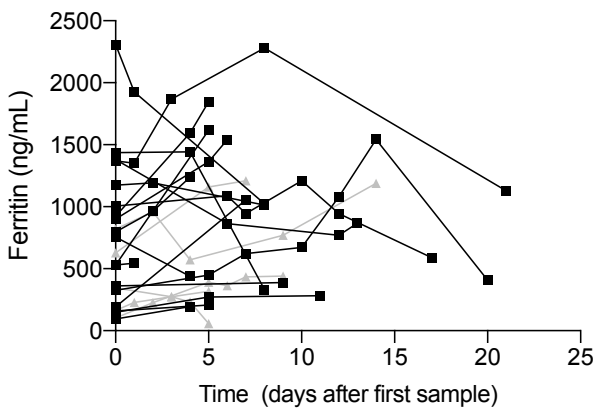

Supplement: Supplementary file [file media-1.pdf]
